# Supplementary material for: Unique (H2O)14 water cages with cyclic (H2O)4 tetramer unit trapped in 3D porous lanthanide–cyclohexanetetracarboxylate frameworks
Source: Royal Society of Chemistry journal article supplement (doi:10.1039/c004258g), 2010-01-01
Supplement: c004258g.pdf [file c004258g.pdf]

*Supporting Information*

**Unique (H<sub>2</sub>O)<sub>14</sub> water clusters with cyclic (H<sub>2</sub>O)<sub>4</sub> tetramer unit trapped in 3D porous lanthanoid-cyclohexanetetracarboxylate frameworks †**

Yong-Cong Ou,<sup>a</sup> Zhuo-jia Lin,<sup>a</sup> and Ming-Liang Tong<sup>\*a,b</sup>

<sup>a</sup> *Key Laboratory of Bioinorganic and Synthetic Chemistry of Ministry of Education / State Key Laboratory of Optoelectronic Materials and Technologies, School of Chemistry and Chemical Engineering, Sun Yat-Sen University, Guangzhou 510275, P. R. China. E-mail:*

[tongml@mail.sysu.edu.cn](mailto:tongml@mail.sysu.edu.cn)

<sup>b</sup> *State Key Laboratory of Structural Chemistry, Fujian Institute of Research on the Structure of Matter, Chinese Academy of Sciences, Fuzhou 350002, P. R. China*

### Experimental Section:

**Improved synthesis of  $[\text{Tb}_4(\text{chtc})_3(\text{H}_2\text{O})_{10}]\cdot 9\text{H}_2\text{O}$  (**1**):** a mixture of  $\text{Tb}(\text{NO}_3)_3\cdot 6\text{H}_2\text{O}$  (0.2 mmol, 0.090 g),  $\text{CuCl}_2\cdot 4\text{H}_2\text{O}$  (0.1 mmol, 0.018 g),  $\text{H}_4\text{chtc}$  (0.2 mmol, 0.051 g), triethylamine (0.6 mmol, 0.061 g) and distilled  $\text{H}_2\text{O}$  (10 mL) was sealed in a 23-mL Teflon-liner autoclave. Heated in an oven to 140 °C for 5 days, and then cooled to room temperature in the rate of 5 °C/h, yielded colorless crystals of **1** (yield: 23 mg, 26 % based on Tb).

**Materials and Physical Measurements.** The reagents and solvents employed were commercially available and used as received without further purification. The C, H, and N microanalyses were carried out with an Elementar Vario-EL CHNS elemental analyzer. The FT-IR spectra were recorded from KBr pellets in the range 4000-400  $\text{cm}^{-1}$  on a Bio-Rad FTS-7 spectrometer. X-ray powder diffraction (XRPD) intensities for polycrystalline samples of **1-3** were measured at 293 K on Bruker D8 Advance Diffractometer (Cu- $\text{K}\alpha$ ,  $\lambda = 1.54056 \text{ \AA}$ ) by scanning over the range of 5-60° with step of 0.2°/s. Calculated patterns of **1-3** were generated with Mercury. TG data were obtained on a TG209F3 Tarsus thermogravimetry, with a heating rate of 10 °C  $\text{min}^{-1}$  in an nitrogen atmosphere. The emission/excitation spectra in the visible and near-infrared region were measured on an Edinburgh FLS-920 spectrophotometer.

**X-Ray Crystallography.** Single crystal diffraction intensities of **1** and **2** was collected on a Rigaku R-Axis SPIDER Image Plate diffractometer with graphite-monochromated  $\text{MoK}\alpha$  radiation ( $\lambda = 0.71073 \text{ \AA}$ ). Diffraction data for compound **3** were recorded on a Bruker Apex CCD area detector diffractometer with  $\text{MoKR}$  radiation ( $\lambda = 0.71073 \text{ \AA}$ ) at 123 K. Absorption corrections were applied by using multiscan program SADABS.<sup>1</sup> The structure was solved with direct method and refined with full-matrix least-squares technique with the SHELXTL program package.<sup>2</sup> Anisotropic thermal parameters were applied to all non-hydrogen atoms. The organic hydrogen atoms were generated geometrically (C-H 0.96 Å).

### Reference:

- 1 G. M. Sheldrick, *SADABS 2.05*, University of Göttingen.
- 2 *SHELXTL 6.10*, Bruker Analytical Instrumentation, Madison, Wisconsin, USA, 2000.

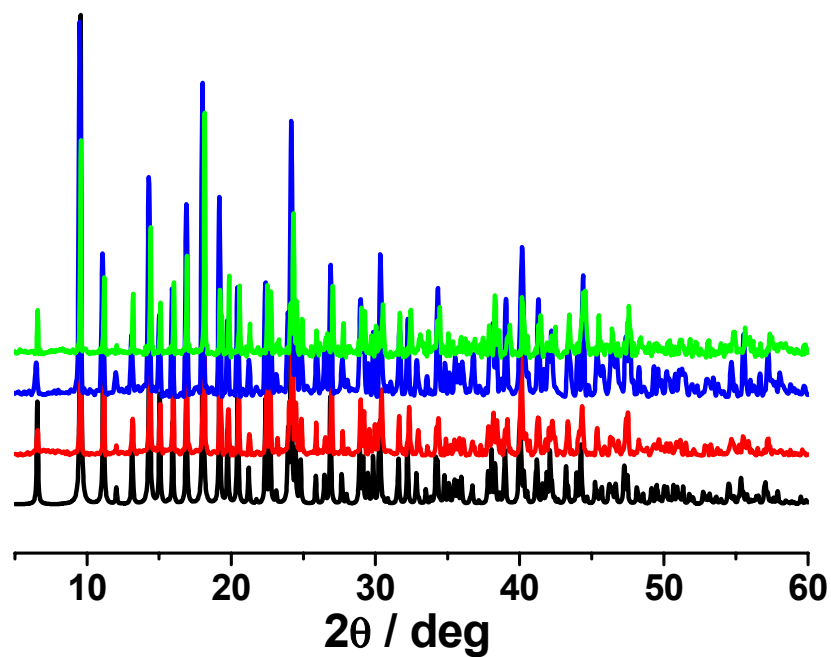

**Fig. S1** XRD patterns of 1 (red), 2 (blue) and 3 (green).

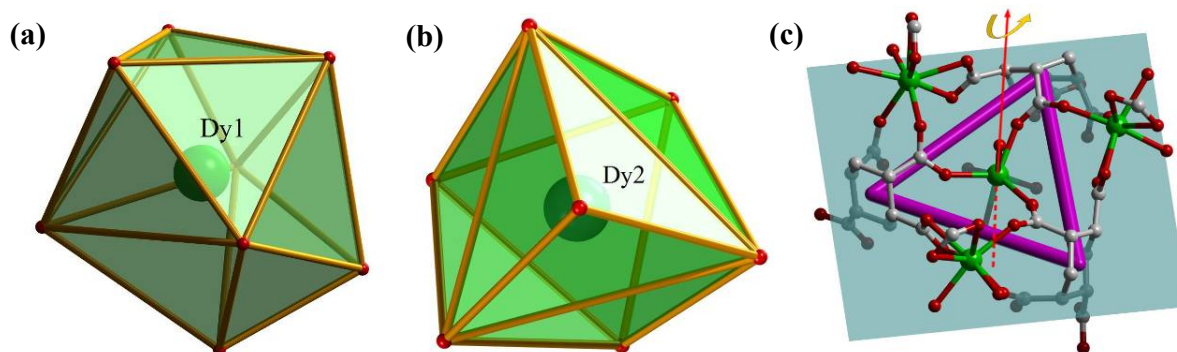

**Fig. S2.** Coordinated modes of Dy1 (a) and Dy2 (b) atoms, and the view of the 3-fold axis on Dy2 atom (c).

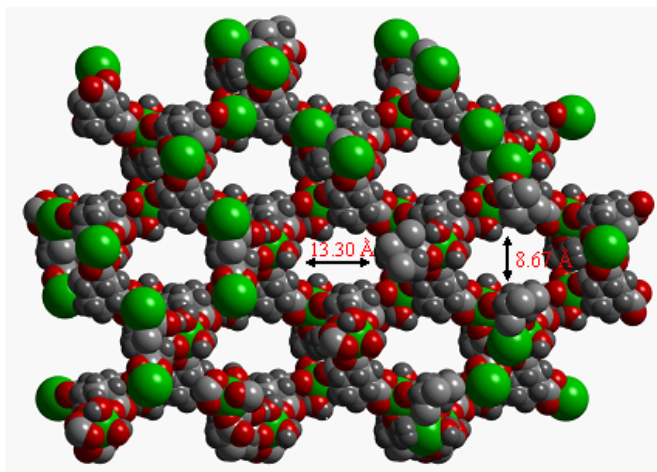

**Fig. S3.** Space-filling graph of porous sizes in one-fold 3D network structure.

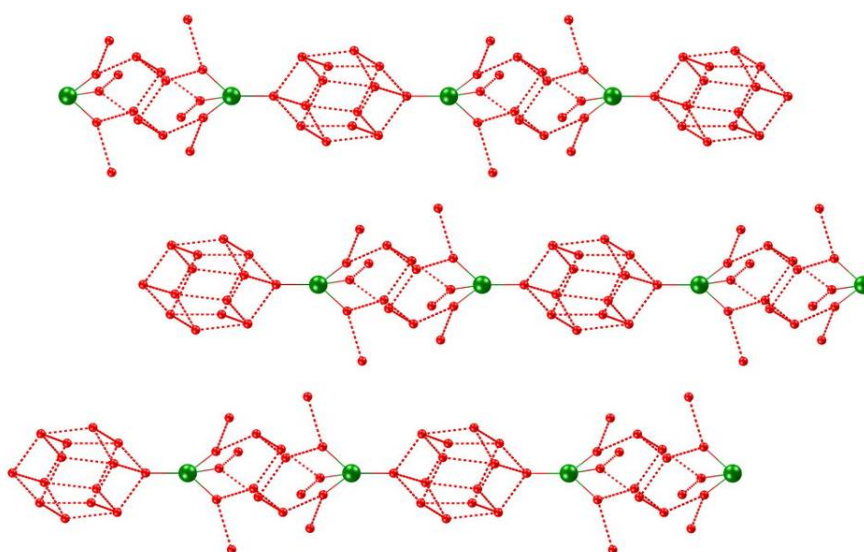

**Fig. S4** The space arrangement of two kinds of water clusters along *c*-axis.

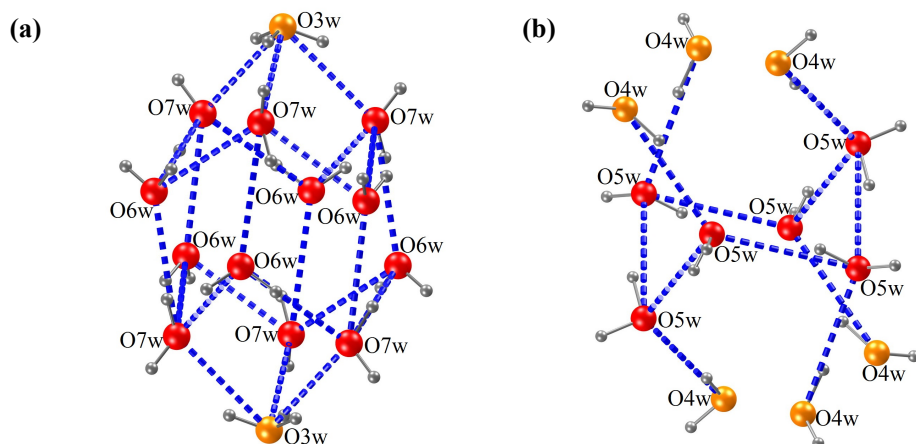

**Fig. S5** The binding modes of  $(\text{H}_2\text{O})_{14}$  (a) and  $(\text{H}_2\text{O})_{12}$  (b) clusters. Colours: red and orange atoms, guest and coordinated water molecules, respectively; grey atoms, hydrogen molecules; green and light purple.

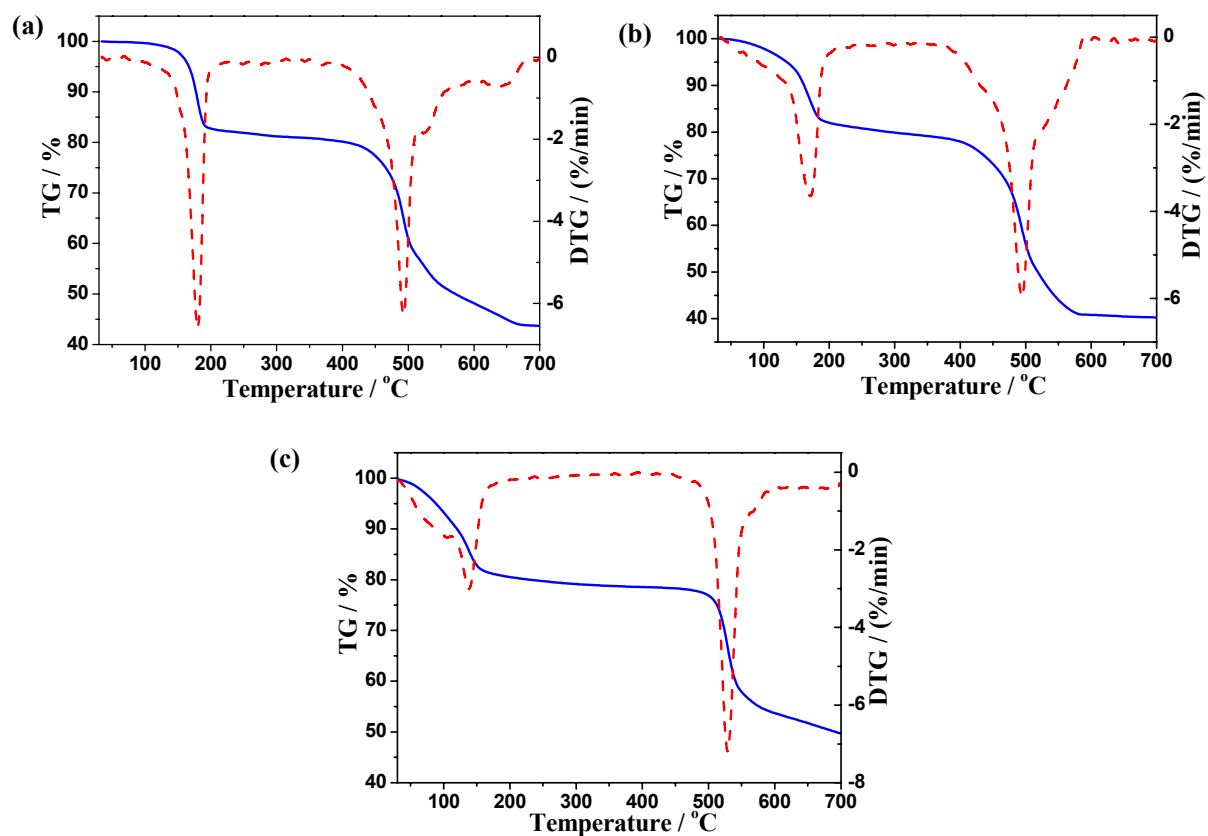

**Fig. S6.** TGA curve of **1** (a), **2** (b) and **3** (c) under nitrogen gas.

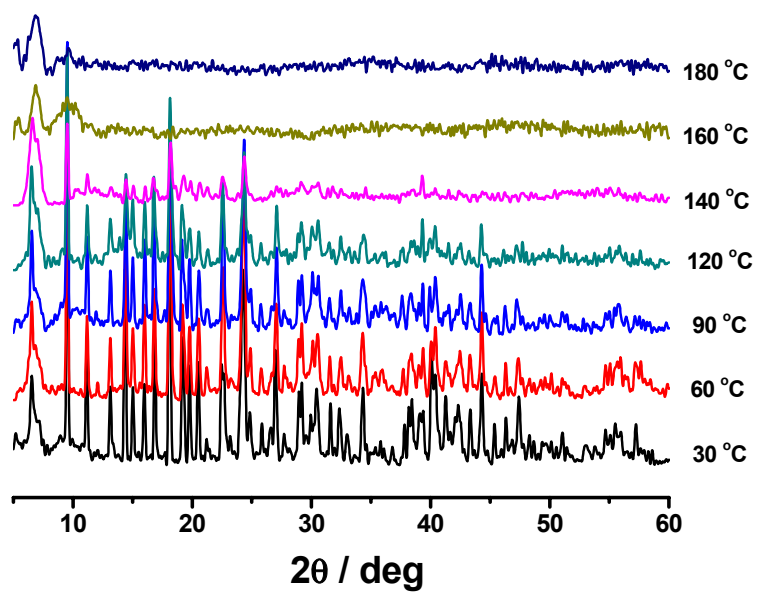

**Fig. S7** Variable-temperature X-ray powder diffraction (VTXRPD) of **1** under  $N_2$  blowing at standard atmospheric pressure from 30 °C to 180 °C

**Table S1.** Selected bond lengths (Å) and angles (°) for **3**.

|                                     |          |                                       |            |
|-------------------------------------|----------|---------------------------------------|------------|
| Dy(1)-O(1)                          | 2.244(7) | Dy(2)-O(2 <i>b</i> )                  | 2.229(8)   |
| Dy(1)-O(8)                          | 2.316(7) | Dy(2)-O(2)                            | 2.229(8)   |
| Dy(1)-O(2 <i>w</i> )                | 2.324(7) | Dy(2)-O(2 <i>c</i> )                  | 2.229(8)   |
| Dy(1)-O(6 <i>a</i> )                | 2.363(7) | Dy(2)-O(4 <i>wb</i> )                 | 2.347(8)   |
| Dy(1)-O(1 <i>w</i> )                | 2.379(7) | Dy(2)-O(4 <i>w</i> )                  | 2.347(8)   |
| Dy(1)-O(3 <i>b</i> )                | 2.389(7) | Dy(2)-O(4 <i>wc</i> )                 | 2.347(8)   |
| Dy(1)-O(4 <i>b</i> )                | 2.488(7) | Dy(2)-O(3 <i>w</i> )                  | 2.386(17)  |
| Dy(1)-O(5 <i>a</i> )                | 2.515(7) |                                       |            |
| O(1)-Dy(1)-O(8)                     | 77.5(3)  | O(6 <i>a</i> )-Dy(1)-O(5 <i>a</i> )   | 53.4(2)    |
| O(1)-Dy(1)-O(2 <i>w</i> )           | 156.2(3) | O(3 <i>b</i> )-Dy(1)-O(5 <i>a</i> )   | 71.6(2)    |
| O(8)-Dy(1)-O(2 <i>w</i> )           | 79.9(2)  | O(4 <i>b</i> )-Dy(1)-O(5 <i>a</i> )   | 115.2(2)   |
| O(1)-Dy(1)-O(1 <i>w</i> )           | 99.1(3)  | O(2)-Dy(2)-O(2 <i>c</i> )             | 114.17(19) |
| O(8)-Dy(1)-O(1 <i>w</i> )           | 80.8(2)  | O(2)-Dy(2)-O(2 <i>b</i> )             | 114.17(18) |
| O(2 <i>w</i> )-Dy(1)-O(1 <i>w</i> ) | 84.7(2)  | O(2 <i>c</i> )-Dy(2)-O(2 <i>b</i> )   | 114.17(19) |
| O(1)-Dy(1)-O(6 <i>a</i> )           | 75.3(3)  | O(2)-Dy(2)-O(4 <i>wb</i> )            | 147.3(3)   |
| O(8)-Dy(1)-O(6 <i>a</i> )           | 139.2(2) | O(2 <i>c</i> )-Dy(2)-O(4 <i>wb</i> )  | 83.9(3)    |
| O(2 <i>w</i> )-Dy(1)-O(6 <i>a</i> ) | 127.9(2) | O(2 <i>b</i> )-Dy(2)-O(4 <i>wb</i> )  | 78.5(3)    |
| O(1 <i>w</i> )-Dy(1)-O(6 <i>a</i> ) | 74.1(2)  | O(2)-Dy(2)-O(4 <i>w</i> )             | 78.5(3)    |
| O(1)-Dy(1)-O(3 <i>b</i> )           | 96.8(3)  | O(2 <i>c</i> )-Dy(2)-O(4 <i>w</i> )   | 147.3(3)   |
| O(8)-Dy(1)-O(3 <i>b</i> )           | 130.7(2) | O(2 <i>b</i> )-Dy(2)-O(4 <i>w</i> )   | 83.9(3)    |
| O(2 <i>w</i> )-Dy(1)-O(3 <i>b</i> ) | 92.1(2)  | O(4 <i>wb</i> )-Dy(2)-O(4 <i>w</i> )  | 72.9(3)    |
| O(1 <i>w</i> )-Dy(1)-O(3 <i>b</i> ) | 147.3(2) | O(2)-Dy(2)-O(4 <i>wc</i> )            | 83.9(3)    |
| O(6 <i>a</i> )-Dy(1)-O(3 <i>b</i> ) | 82.6(2)  | O(2 <i>c</i> )-Dy(2)-O(4 <i>wc</i> )  | 78.5(3)    |
| O(1)-Dy(1)-O(4 <i>b</i> )           | 91.9(3)  | O(2 <i>b</i> )-Dy(2)-O(4 <i>wc</i> )  | 147.3(3)   |
| O(8)-Dy(1)-O(4 <i>b</i> )           | 78.4(2)  | O(4 <i>wb</i> )-Dy(2)-O(4 <i>wc</i> ) | 72.9(3)    |
| O(2 <i>w</i> )-Dy(1)-O(4 <i>b</i> ) | 76.0(2)  | O(4 <i>w</i> )-Dy(2)-O(4 <i>wc</i> )  | 72.9(3)    |
| O(1 <i>w</i> )-Dy(1)-O(4 <i>b</i> ) | 153.7(2) | O(2)-Dy(2)-O(3 <i>w</i> )             | 75.8(2)    |
| O(6 <i>a</i> )-Dy(1)-O(4 <i>b</i> ) | 132.0(2) | O(2 <i>c</i> )-Dy(2)-O(3 <i>w</i> )   | 75.8(2)    |
| O(3 <i>b</i> )-Dy(1)-O(4 <i>b</i> ) | 52.6(2)  | O(2 <i>b</i> )-Dy(2)-O(3 <i>w</i> )   | 75.8(2)    |
| O(1)-Dy(1)-O(5 <i>a</i> )           | 128.2(3) | O(4 <i>wb</i> )-Dy(2)-O(3 <i>w</i> )  | 136.67(19) |
| O(8)-Dy(1)-O(5 <i>a</i> )           | 147.6(2) | O(4 <i>w</i> )-Dy(2)-O(3 <i>w</i> )   | 136.67(19) |
| O(2 <i>w</i> )-Dy(1)-O(5 <i>a</i> ) | 75.6(2)  | O(4 <i>wc</i> )-Dy(2)-O(3 <i>w</i> )  | 136.67(19) |
| O(1 <i>w</i> )-Dy(1)-O(5 <i>a</i> ) | 76.0(2)  |                                       |            |

Symmetry code: *a*) -x+y+7/3, -x+2/3, z-1/3; *b*) -y+1, x-y-1, z; *c*) -x+y+2, -x+1, z.

**Table S2.** Selected hydrogen bond lengths (Å) and angles (°) for **3**.

| D-H...A               | d(D-H) | D(H...A) | d(D...A)  | <(D-H...A) |
|-----------------------|--------|----------|-----------|------------|
| O(1W)-H(1WA)...O(7a)  | 0.85   | 1.92     | 2.761(10) | 171.7      |
| O(1W)-H(1WB)...O(5e)  | 0.84   | 2.16     | 2.846(9)  | 138.4      |
| O(2W)-H(2WA)...O(4e)  | 0.85   | 1.86     | 2.651(10) | 155.1      |
| O(2W)-H(2WB)...O(7f)  | 0.84   | 1.83     | 2.653(9)  | 164.6      |
| O(3W)-H(3W)...O(7W)   | 0.84   | 1.94     | 2.67(3)   | 144.2      |
| O(4W)-H(4WA)...O(5W)  | 0.85   | 1.97     | 2.786(12) | 163.0      |
| O(4W)-H(4WB)...O(4b)  | 0.84   | 2.24     | 2.908(11) | 136.0      |
| O(5W)-H(5WA)...O(5)   | 0.84   | 2.08     | 2.874(10) | 157.1      |
| O(5W)-H(5WB)...O(5Wg) | 0.84   | 1.97     | 2.767(11) | 157.5      |
| O(6W)-H(6WA)...O(6)   | 0.84   | 2.07     | 2.906(19) | 173.2      |
| O(6W)-H(6WB)...O(7Wd) | 0.84   | 2.10     | 2.83(4)   | 144.9      |
| O(7W)-H(7WA)...O(3)   | 0.85   | 2.35     | 3.18(3)   | 168.0      |
| O(7W)-H(7WB)...O(6Wh) | 0.85   | 2.14     | 2.86(4)   | 142.0      |

Symmetry codes: *a*)  $-x+y+7/3, -x+2/3, z-1/3$ ; *b*)  $-y+1, x-y-1, z$ ; *c*)  $-x+y+2, -x+1, z$ ; *d*)  $-y+2/3, x-y-5/3, z+1/3$ ; *e*)  $y+4/3, -x+y+2/3, -z-1/3$ ; *f*)  $-x+7/3, -y-1/3, -z-1/3$ ; *g*)  $x-y, x-1, -z$ ; *h*)  $-x+5/3, -y-2/3, -z-2/3$ .
